# Supplementary material for: Keratin Expression in Podocytopathies, ANCA-Associated Vasculitis and IgA Nephropathy
Source: MDPI journal article supplement (doi:10.3390/ijms25031805), 2024-02-02
Supplement: s1 [file s1]

**Supplementary Table S1.** List of antibodies used for immunohistochemistry.

| Target     | Clone/Label | Host   | Supplier          |
|------------|-------------|--------|-------------------|
| K7         | OV-TL12/30  | mouse  | Dako              |
| K8         | EP1628Y     | rabbit | Thermo scientific |
| K18        | RCK 106     | mouse  | Progen            |
| K19        | KS19.1      | mouse  | Thermo scientific |
| Mouse IgG  | biotin      | sheep  | Vector            |
| Rabbit IgG | biotin      | goat   | Vector            |
